# Supplementary material
Source: PubMed Central journal article supplement (PMC5836547)
Supplement: NIHMS943601-supplement-supporting_information.pdf [file NIHMS943601-supplement-supporting_information.pdf]

## SUPPORTING INFORMATION

### **ProSelection: A Novel Algorithm to Select Proper Protein Structure Subsets for in Silico Target Identification and Drug Discovery Research**

**Nanyi Wang<sup>†</sup>, Lirong Wang<sup>†,\*</sup>, and Xiang-Qun Xie<sup>†,\*</sup>**

<sup>†</sup>Department of Pharmaceutical Sciences and Computational Chemical Genomics Screening Center, School of Pharmacy; NIH National Center of Excellence for Computational Drug Abuse Research; Drug Discovery Institute; University of Pittsburgh, Pittsburgh, Pennsylvania 15260, United States

**\*Corresponding Author: Xiang-Qun (Sean) Xie, MBA, Ph.D.**

Professor of Pharmaceutical Sciences/Drug Discovery Institute

Director of CCGS and NIDA CDAR Centers

335 Sutherland Drive, 206 Pavilion, School of Pharmacy

University of Pittsburgh

Pittsburgh, PA15261, USA

412-383-5276 (Phone)

412-383-7436 (Fax)

Email: [xix15@pitt.edu](mailto:xix15@pitt.edu)

**\*Co-corresponding Author: Lirong Wang, Ph.D.**

Assistant Professor of Pharmaceutical Sciences, School of Pharmacy

University of Pittsburgh

517 Salk Hall, 3501 Terrace Street

Pittsburgh, PA15261, USA

412-624-8118 (Phone)

Email: liw30@pitt.edu

## SUPPLEMENTARY

### TABLE

**Table S1. Number of available crystal structures for 19 protein targets (data from RCSB Protein Data Bank).**

| Protein name | Number of crystal structures |
|--------------|------------------------------|
| ABL1_HUMAN   | 19                           |
| PIM2_HUMAN   | 2                            |
| MTOR_HUMAN   | 6                            |
| AKT3_HUMAN   | 1                            |
| AKT2_HUMAN   | 16                           |
| AKT1_HUMAN   | 12                           |
| PK3CA_HUMAN  | 17                           |
| SIR2_HUMAN   | 19                           |
| SIR1_HUMAN   | 8                            |
| LRRK2_HUMAN  | 2                            |
| INSR_HUMAN   | 18                           |
| HDAC6_HUMAN  | 4                            |
| CATM_HUMAN   | 3                            |
| CATD_HUMAN   | 6                            |
| CATB_HUMAN   | 11                           |
| CASP1_HUMAN  | 27                           |
| B2CL1_HUMAN  | 33                           |
| BCL2_HUMAN   | 11                           |
| PDPK1_HUMAN  | 53                           |

The result shown above is a searching result of November 2016. The number of PDB structures available online is ever changing. Abbreviations: PDPK1, 3-phosphoinositide-dependent protein kinase 1; B2CL1, Bcl-2-like protein 1; CASP1, Caspase-1; CATB, Cathepsin B; CATD, Cathepsin D; HDAC6, Histone deacetylase 6;

INSR, Insulin receptor; SIR1, NAD-dependent protein deacetylase sirtuin-1; SIR2, NAD-dependent protein deacetylase sirtuin-2; PK3CA, Phosphatidylinositol 4,5-bisphosphate 3-kinase catalytic subunit alpha isoform; AKT1, RAC-alpha serine/threonine-protein kinase; AKT2, RAC-beta serine/threonine-protein kinase; MTOR, Serine/threonine-protein kinase mTOR; ABL1, Tyrosine-protein kinase ABL1.

**Table S2. Suggested docking score threshold for active ligands (SDA) of 142 “strong selector” protein structures.**

| PDB ID_Chain | Target | Threshold | TPR  | FPR  | PDB ID_Chain | Target | Threshold | TPR  | FPR  |
|--------------|--------|-----------|------|------|--------------|--------|-----------|------|------|
| 1csb_B       | CATB   | 6.51      | 0.11 | 0.04 | 3rwp_A       | PDPK1  | 8.46      | 0.23 | 0.03 |
| 1gag_A       | INSR   | 6.37      | 0.15 | 0.04 | 3rwq_A       | PDPK1  | 8.39      | 0.20 | 0.03 |
| 1huc_B       | CATB   | 6.57      | 0.15 | 0.04 | 3sc1_A       | PDPK1  | 8.76      | 0.10 | 0.03 |
| 1i44_A       | INSR   | 6.54      | 0.21 | 0.04 | 3spf_A       | B2CL1  | 6.27      | 0.05 | 0.03 |
| 1ir3_A       | INSR   | 6.50      | 0.16 | 0.04 | 3zim_A       | PK3CA  | 8.44      | 0.13 | 0.04 |
| 1irk_A       | INSR   | 6.09      | 0.22 | 0.04 | 3zln_A       | B2CL1  | 9.59      | 0.56 | 0.03 |
| 1lya_B       | CATD   | 5.30      | 0.49 | 0.04 | 3zlo_A       | B2CL1  | 8.25      | 0.44 | 0.04 |
| 1lyb_B       | CATD   | 5.67      | 0.35 | 0.04 | 4a06_A       | PDPK1  | 7.61      | 0.21 | 0.03 |
| 1lyw_B       | CATD   | 5.31      | 0.31 | 0.04 | 4a07_A       | PDPK1  | 7.76      | 0.28 | 0.03 |
| 1oky_A       | PDPK1  | 8.82      | 0.15 | 0.03 | 4a1u_A       | B2CL1  | 6.40      | 0.14 | 0.03 |
| 1okz_A       | PDPK1  | 9.23      | 0.13 | 0.03 | 4a1w_A       | B2CL1  | 6.76      | 0.12 | 0.04 |
| 1p14_A       | INSR   | 6.70      | 0.19 | 0.04 | 4aw0_A       | PDPK1  | 7.34      | 0.27 | 0.03 |
| 1rqq_A       | INSR   | 6.20      | 0.18 | 0.04 | 4aw1_A       | PDPK1  | 8.99      | 0.14 | 0.03 |
| 1rwk_A       | CASP1  | 5.04      | 0.26 | 0.04 | 4bpk_A       | B2CL1  | 5.92      | 0.08 | 0.04 |
| 1uu3_A       | PDPK1  | 7.96      | 0.20 | 0.03 | 4c52_A       | B2CL1  | 5.00      | 0.20 | 0.04 |
| 1uu7_A       | PDPK1  | 7.85      | 0.22 | 0.03 | 4c5d_A       | B2CL1  | 5.31      | 0.10 | 0.02 |
| 1uvr_A       | PDPK1  | 7.40      | 0.36 | 0.03 | 4cin_A       | B2CL1  | 4.92      | 0.15 | 0.04 |
| 2auh_A       | INSR   | 6.91      | 0.12 | 0.04 | 4ct1_A       | PDPK1  | 7.82      | 0.16 | 0.03 |
| 2b4s_B       | INSR   | 7.62      | 0.07 | 0.04 | 4ehr_A       | B2CL1  | 5.20      | 0.12 | 0.04 |
| 2biy_A       | PDPK1  | 7.86      | 0.22 | 0.03 | 4ejn_A       | AKT1   | 5.98      | 0.16 | 0.05 |
| 2hbz_A       | CASP1  | 5.23      | 0.22 | 0.04 | 4ekk_A       | AKT1   | 8.11      | 0.19 | 0.05 |
| 2ipp_B       | CATB   | 6.68      | 0.12 | 0.03 | 4ekl_A       | AKT1   | 8.98      | 0.17 | 0.05 |
| 2pe0_A       | PDPK1  | 8.21      | 0.14 | 0.03 | 4gv1_A       | AKT1   | 7.59      | 0.27 | 0.05 |
| 2pe2_A       | PDPK1  | 8.44      | 0.11 | 0.03 | 4ibm_A       | INSR   | 6.32      | 0.27 | 0.04 |
| 2r7b_A       | PDPK1  | 8.51      | 0.14 | 0.03 | 4jps_A       | PK3CA  | 7.93      | 0.16 | 0.04 |

|        |       |      |      |      |        |       |      |      |      |
|--------|-------|------|------|------|--------|-------|------|------|------|
| 2rd0_A | PK3CA | 6.74 | 0.14 | 0.04 | 4jsn_A | MTOR  | 8.78 | 0.06 | 0.04 |
| 2x39_A | AKT2  | 8.06 | 0.29 | 0.04 | 4jsp_A | MTOR  | 7.00 | 0.17 | 0.04 |
| 2xch_A | PDPK1 | 9.14 | 0.06 | 0.03 | 4jsv_A | MTOR  | 7.04 | 0.16 | 0.04 |
| 2xck_A | PDPK1 | 8.46 | 0.13 | 0.03 | 4jsx_A | MTOR  | 8.05 | 0.17 | 0.04 |
| 2yj1_A | B2CL1 | 5.66 | 0.15 | 0.03 | 4jt5_A | MTOR  | 8.42 | 0.12 | 0.04 |
| 2yq6_A | B2CL1 | 5.14 | 0.10 | 0.03 | 4jt6_A | MTOR  | 7.89 | 0.17 | 0.04 |
| 2yxj_A | B2CL1 | 5.42 | 0.19 | 0.04 | 4l1b_A | PK3CA | 7.25 | 0.12 | 0.04 |
| 2z8c_A | INSR  | 6.34 | 0.22 | 0.04 | 4l23_A | PK3CA | 8.24 | 0.13 | 0.04 |
| 3ai8_B | CATB  | 6.87 | 0.05 | 0.04 | 4l3o_A | SIR2  | 8.88 | 0.03 | 0.04 |
| 3bu3_A | INSR  | 6.20 | 0.25 | 0.04 | 4obz_B | CATD  | 6.16 | 0.30 | 0.04 |
| 3bu5_A | INSR  | 6.12 | 0.19 | 0.04 | 4oc6_B | CATD  | 5.38 | 0.48 | 0.04 |
| 3bu6_A | INSR  | 6.77 | 0.17 | 0.04 | 4od9_B | CATD  | 5.65 | 0.39 | 0.04 |
| 3cbj_A | CATB  | 7.50 | 0.14 | 0.04 | 4ovu_A | PK3CA | 6.94 | 0.20 | 0.04 |
| 3cbk_A | CATB  | 7.55 | 0.09 | 0.04 | 4ovv_A | PK3CA | 7.05 | 0.10 | 0.04 |
| 3cqu_A | AKT1  | 8.80 | 0.13 | 0.05 | 4ppi_A | B2CL1 | 3.76 | 0.25 | 0.04 |
| 3cqw_A | AKT1  | 8.62 | 0.11 | 0.05 | 4qve_A | B2CL1 | 7.62 | 0.07 | 0.03 |
| 3ekk_A | INSR  | 6.55 | 0.16 | 0.04 | 4qvf_A | B2CL1 | 5.61 | 0.14 | 0.03 |
| 3ekn_A | INSR  | 7.54 | 0.08 | 0.04 | 4qvx_A | B2CL1 | 8.82 | 0.46 | 0.04 |
| 3eta_A | INSR  | 6.75 | 0.21 | 0.04 | 4rqk_A | PDPK1 | 8.31 | 0.17 | 0.03 |
| 3h9o_A | PDPK1 | 8.53 | 0.23 | 0.03 | 4rqv_A | PDPK1 | 8.34 | 0.11 | 0.03 |
| 3hhm_A | PK3CA | 7.88 | 0.08 | 0.04 | 4rrv_A | PDPK1 | 7.57 | 0.20 | 0.03 |
| 3hiz_A | PK3CA | 6.67 | 0.06 | 0.04 | 4tuh_A | B2CL1 | 9.22 | 0.26 | 0.03 |
| 3hrc_A | PDPK1 | 7.63 | 0.28 | 0.03 | 4tuu_A | PK3CA | 6.93 | 0.14 | 0.04 |
| 3hrf_A | PDPK1 | 8.17 | 0.16 | 0.03 | 4tv3_A | PK3CA | 7.87 | 0.15 | 0.04 |
| 3ion_A | PDPK1 | 8.14 | 0.32 | 0.03 | 4waf_A | PK3CA | 7.47 | 0.13 | 0.03 |
| 3iop_A | PDPK1 | 8.56 | 0.22 | 0.03 | 4xlv_A | INSR  | 5.93 | 0.30 | 0.04 |
| 3nay_A | PDPK1 | 8.99 | 0.11 | 0.03 | 4xx9_A | PDPK1 | 8.49 | 0.08 | 0.03 |
| 3o96_A | AKT1  | 6.40 | 0.17 | 0.05 | 4z9v_A | B2CL1 | 5.68 | 0.10 | 0.03 |
| 3orx_A | PDPK1 | 8.29 | 0.16 | 0.03 | 4zop_A | PK3CA | 8.42 | 0.08 | 0.04 |
| 3orz_A | PDPK1 | 8.47 | 0.22 | 0.03 | 4zzi_A | PK3CA | 9.30 | 0.46 | 0.04 |
| 3otu_A | PDPK1 | 8.16 | 0.21 | 0.03 | 5ack_A | PDPK1 | 7.21 | 0.42 | 0.03 |
| 3ow4_A | AKT1  | 7.06 | 0.31 | 0.05 | 5b8d_A | HDAC6 | 7.04 | 0.07 | 0.04 |
| 3pwy_A | PDPK1 | 7.63 | 0.20 | 0.03 | 5c3g_A | B2CL1 | 6.28 | 0.10 | 0.02 |
| 3qcq_A | PDPK1 | 8.57 | 0.17 | 0.03 | 5dxh_A | PK3CA | 7.15 | 0.18 | 0.04 |
| 3qcs_A | PDPK1 | 8.59 | 0.17 | 0.03 | 5dxt_A | PK3CA | 8.88 | 0.12 | 0.04 |
| 3qcx_A | PDPK1 | 8.64 | 0.20 | 0.03 | 5e1s_A | INSR  | 7.73 | 0.12 | 0.03 |
| 3qcy_A | PDPK1 | 9.94 | 0.06 | 0.03 | 5fi4_A | PK3CA | 7.84 | 0.14 | 0.04 |
| 3qd0_A | PDPK1 | 9.21 | 0.12 | 0.03 | 5fmj_A | PK3CA | 6.80 | 0.17 | 0.04 |
| 3qd3_A | PDPK1 | 9.23 | 0.09 | 0.03 | 5fmk_A | B2CL1 | 5.52 | 0.25 | 0.04 |
| 3qd4_A | PDPK1 | 9.72 | 0.10 | 0.00 | 5hkm_A | PDPK1 | 8.50 | 0.17 | 0.00 |
| 3qkd_A | B2CL1 | 5.99 | 0.10 | 0.04 | 5ho7_A | PDPK1 | 8.16 | 0.07 | 0.03 |

|        |       |      |      |      |        |       |       |      |      |
|--------|-------|------|------|------|--------|-------|-------|------|------|
| 3qkk_A | AKT1  | 8.19 | 0.07 | 0.05 | 5ho8_A | PDPK1 | 10.05 | 0.15 | 0.03 |
| 3qkl_A | AKT1  | 7.70 | 0.23 | 0.05 | 5kcv_A | AKT1  | 5.71  | 0.21 | 0.05 |
| 3qkm_A | AKT1  | 8.30 | 0.20 | 0.05 | 5kh3_A | HDAC6 | 6.92  | 0.15 | 0.04 |
| 3r85_A | B2CL1 | 5.20 | 0.10 | 0.04 | 5kh7_A | HDAC6 | 6.66  | 0.15 | 0.04 |
| 3rej_A | PDPK1 | 7.87 | 0.33 | 0.03 | 5kh9_A | HDAC6 | 7.03  | 0.06 | 0.04 |

Abbreviations: TPR, true positive rate; FPR, false positive rate. PDPK1, 3-phosphoinositide-dependent protein kinase 1; B2CL1, Bcl-2-like protein 1; CASP1, Caspase-1; CATB, Cathepsin B; CATD, Cathepsin D; HDAC6, Histone deacetylase 6; INSR, Insulin receptor; SIR1, NAD-dependent protein deacetylase sirtuin-1; SIR2, NAD-dependent protein deacetylase sirtuin-2; PK3CA, Phosphatidylinositol 4,5-bisphosphate 3-kinase catalytic subunit alpha isoform; AKT1, RAC-alpha serine/threonine-protein kinase; AKT2, RAC-beta serine/threonine-protein kinase; MTOR, Serine/threonine-protein kinase mTOR; ABL1, Tyrosine-protein kinase ABL1.

FIGURE

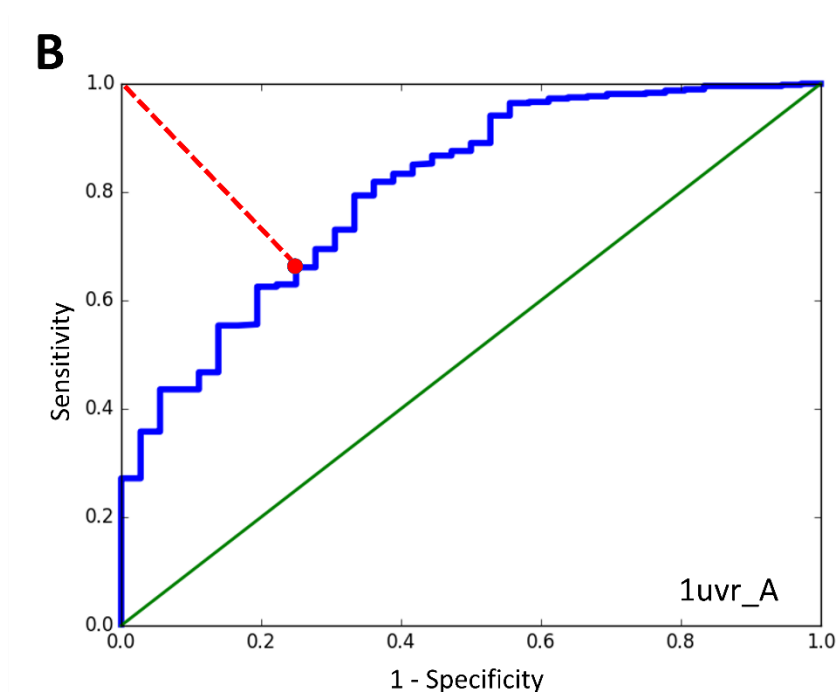

**Figure S1. SDA generation.** Optimal cutoff point calculation for PDB protein structure 1uvr. Optimal cutoff point is calculated for each ROC curve using Pathagoras' theorem, which minimizing the distance (red dash line) between the top-left corner in the ROC plot and the selected points on the ROC. we require the  $FPR^3 \leq 0.0001$  for each point to be considered as a “valid point” before using the Pathagoras' theorem. The docking score threshold corresponding to the Optimal cutoff point is named the Suggested Docking Score Threshold for Active Ligands (SDA). For structure 1uvr, the red dot in the figure is selected as the optimized point. It's corresponding docking score is 7.40 and the false positive rate (FPR) is 0.04. This point has the lowest distance (optimized sensitivity and specificity) to the top-left corner among all the points on the ROC curve which have  $FPR \leq 0.0001$ .

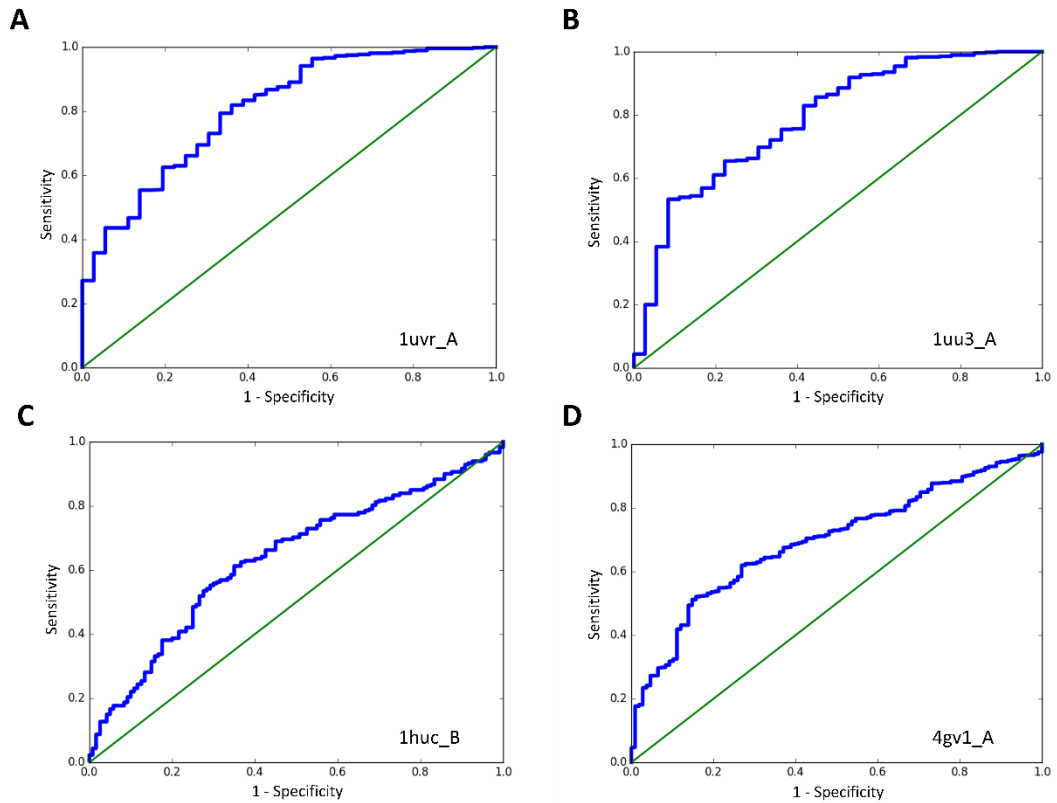

**Figure S2. ROC curve of 4 “strong selector” structures.** The receiver operating characteristic (ROC) curve of one of the PDB structures of (A) 3-phosphoinositide-dependent protein kinase 1 (PDBid 1uvr, chain A, SDA = 7.40). (B) 3-phosphoinositide-dependent protein kinase 1 (PDBid 1uu3, chain A, SDA = 7.96). (C) Cathepsin B (PDBid 1huc, chain B, SDA = 6.57). (D) RAC-alpha serine/threonine-protein kinase (PDBid 4gv1, chain A, SDA = 7.59).

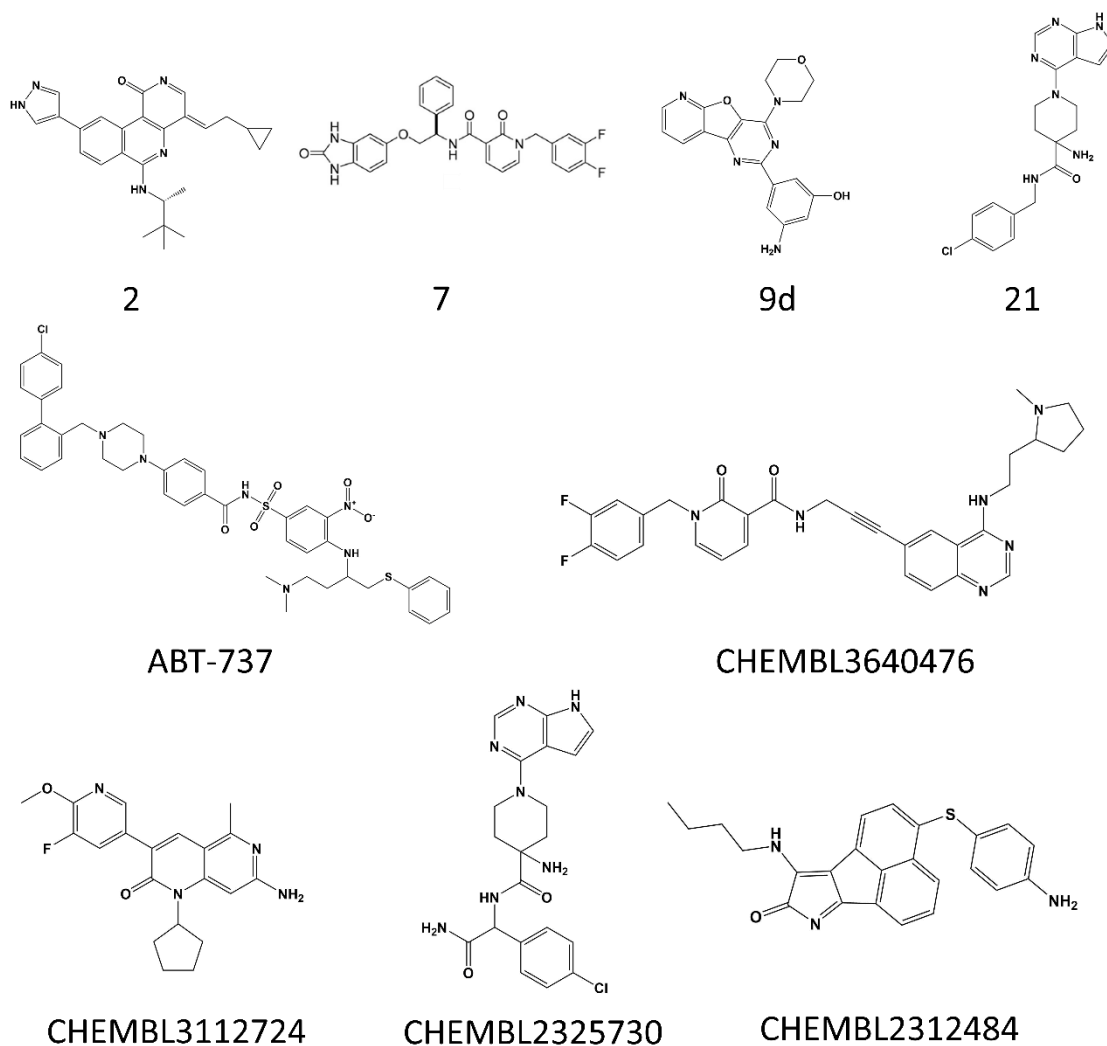

**Figure S3. Structures of the inhibitors.** Chemical structures of five protein co-crystallized inhibitors and four known protein inhibitors. Compound 2, compound 7, compound 9d, and compound 21 are named using the code number in their original paper. ABT-737 is a known Bcl-xL inhibitor. CHEMBL3640476 is a known PDPK1 ATP competitive inhibitor. CHEMBL3112724 is a known PI3K $\alpha$  ATP competitive inhibitor. CHEMBL2325730 is a known AKT2 ATP competitive inhibitor. CHEMBL2312484 is a BH3 mimics which inhibit the Bcl-xL.



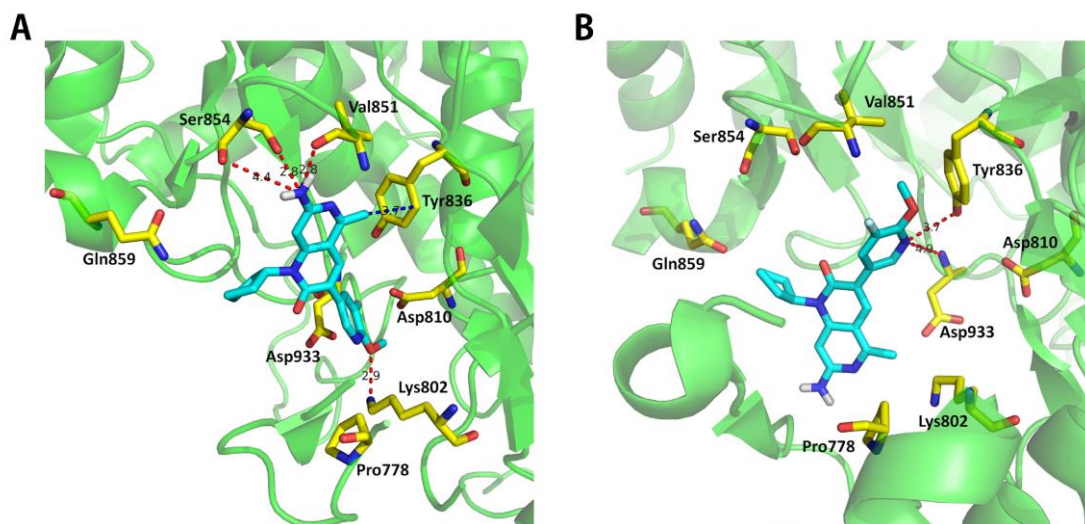

**Figure S4. Structures of the compound CHEMBL3112724 bind to the kinase domain in the PI3K $\alpha$ .** (A) CHEMBL3112724 binds to the PI3K $\alpha$  crystal structure 4L23 (Docking score 9.64). (B) CHEMBL3112724 binds to the PI3K $\alpha$  crystal structure 4L2Y (Docking score 5.87). Blue sticks represent the inhibitor compound CHEMBL3640476. Yellow sticks represent the important residues which are also labeled. H-bonds to the important residues are displayed as dashed red lines. 4L2Y and 4L23 are derived from the X-ray structure of the protein kinase PI3K $\alpha$ . Structure 4L2Y is co-crystallized with compound 9d (Supplementary figure 3), a PI103 derivative and known inhibitor of PI3K $\alpha$ <sup>36</sup>. 4L23 is the native complex of PI103 to PI3K $\alpha$ . Compound 9d would cause a decreased potency due to the electrostatic repulsion between the incoming NH<sub>2</sub> substitute and Lys802<sup>36</sup>. However, in the in vitro experiment, compound 9d was as potent as PI103 against the PI3K $\alpha$  due to the extra flexibility of Lys802 given by compound 9d. This flexibility also induces additional space at the catalytic site when it is compared to the original protein structure like 4L23<sup>36</sup>. A known PI3K $\alpha$  ATP competitive inhibitor, CHEMBL3112724, was used to dock both 4L2Y and 4L23 in our research. In 4L23, CHEMBL3112724 has H-bond to Lys802, Val851, and two H-bonds to Ser854. However, in 4L2Y, only two H-bonds are formed between CHEMBL3112724 and PI3K $\alpha$ . In our structure selection, 4L2Y is the only structure for PI3K $\alpha$  which is labeled as a “weak selector” ( $p = 0.57$ ) while 4L23 is labeled as a “strong selector” structure ( $p = 3.6 \times 10^{-5}$ ). The high  $p$ -value of 4L2Y may be caused by the structural change of this protein because

of the co-crystallized compound 9d. As is described before, compound 9d induces a more flexible Lys802, which is one of the most important residues inside the docking pocket. Consistent with the failure of molecular docking to predict the experimental potency of 4L2Y in Zhang's group<sup>36</sup>, the disability of our selection procedure to label this structure as a "strong selector" is not surprising.

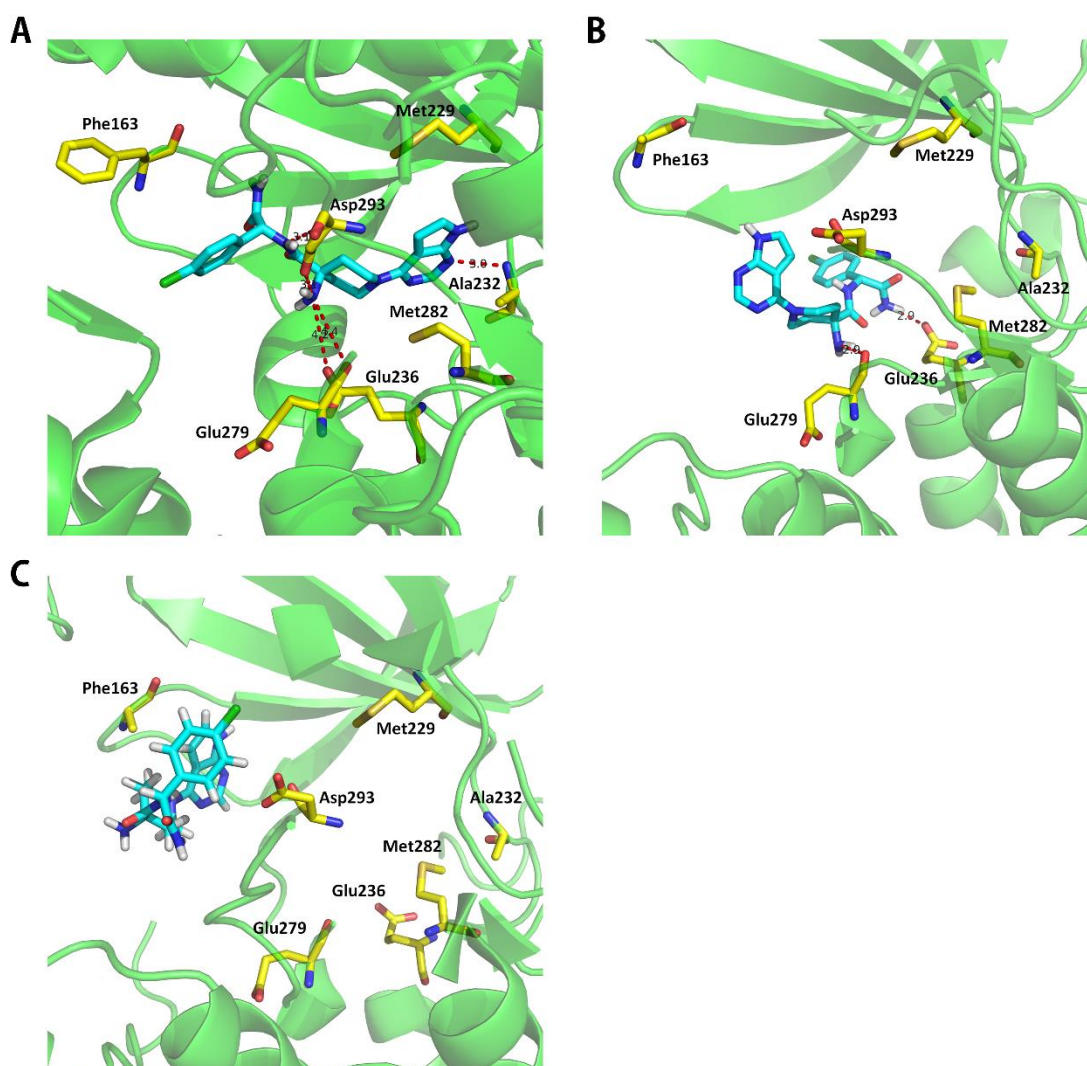

**Figure S5. Structures of the compound CHEMBL2325730 bind to the ATP binding site within the kinase domain in AKT2.** (A) CHEMBL2325730 binds to the AKT2 crystal structure 2X39 (Docking score 9.11). (B) CHEMBL2325730 binds to the AKT2 crystal structure 1MRV (Docking score 3.53). (C) CHEMBL2325730 binds to the AKT2 crystal structure 1MRY (Docking score 2.66). Blue sticks represent

the inhibitor compound CHEMBL2325730. Yellow sticks represent the important residues which are also labeled. H-bonds to the important residues are displayed as dashed red lines. 2X39, 1MRY, and 1MRV are structures of protein kinase B (PKB or AKT2). Structure 2X39 is the active AKT2 co-crystallized with the known inhibitor compound 21<sup>37</sup> (Supplementary figure 3). 1MRY and 1MRV are crystal structures of an inactive AKT2 kinase domain<sup>38</sup>. In the structure selection, 2X39 is a “strong selector” structure ( $p = 0.012$ ) while 1MRY ( $p = 1$ ) and 1MRV ( $p = 1$ ) are “weak selector” structures. In the docking study, known AKT2 ATP competitive inhibitor CHEMBL2325730 has H-bonds to Ala232, Glu236, Glu279 and Asp293. However, in 1MRV, only two H-bonds are formed between CHEMBL2325730 and AKT2. No H-bond is formed in 1MRY. Structure 1MRV even has higher docking scores for inactive ligands when compared to active ligands. Although the reason behind this “reversed” distribution of docking scores remains unknown, ProSelection has proved once again to be able to distinguish active protein conformations from inactive conformations.
